# Supplementary material
Source: Springer Nature journal article supplement (https://www.springermedizin.de/resource/supplementary/12890_2010_269_MOESM27_ESM.pdf/9504838)

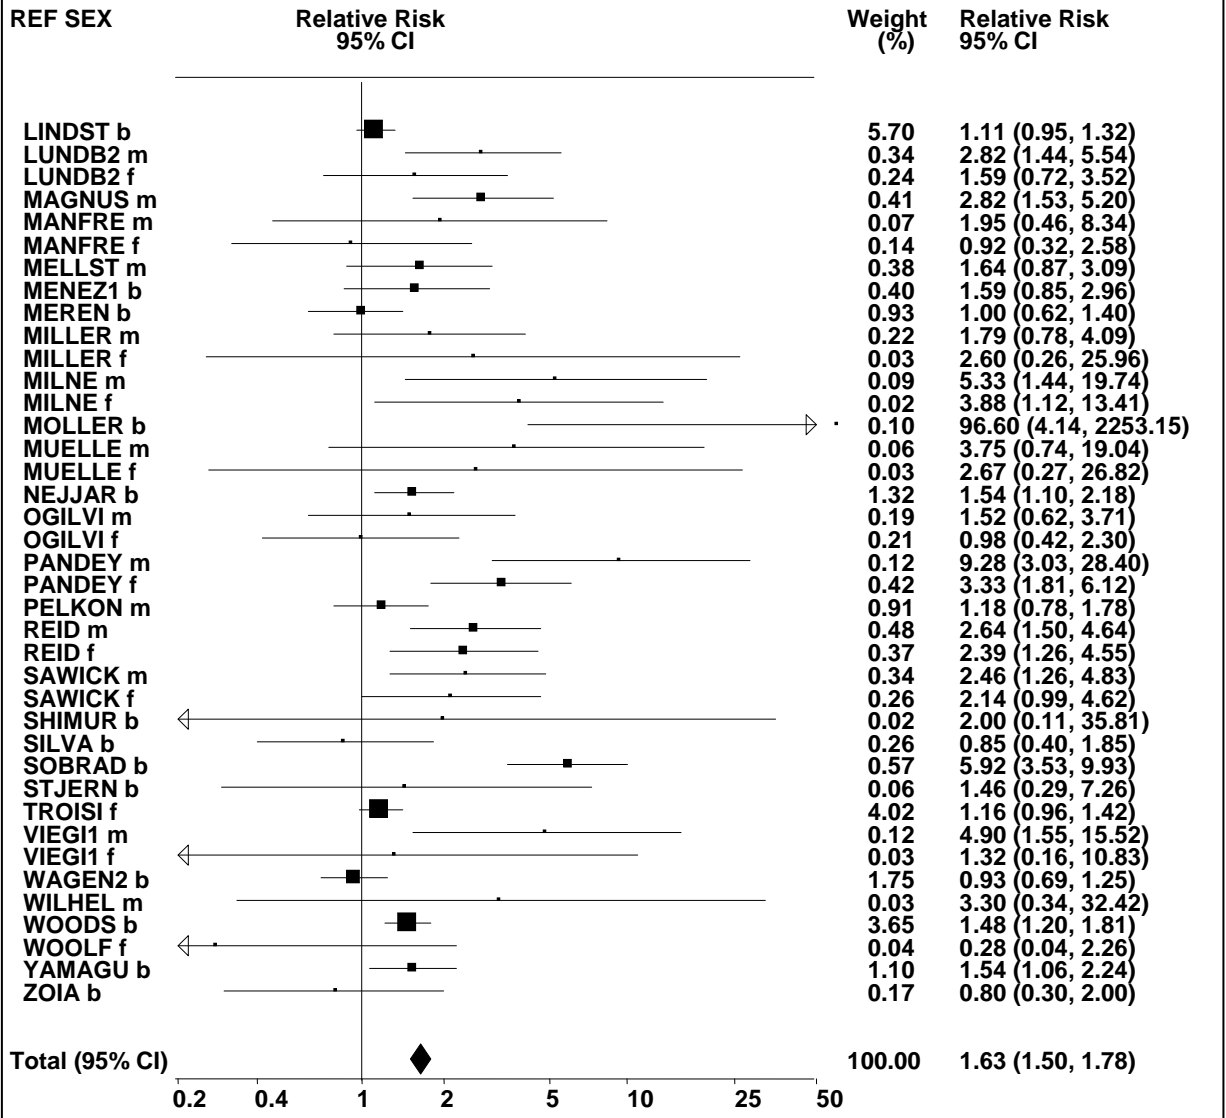

Supplement: MOESM27 [file 9504838]
